# Supplementary material for: Effects of Vitamin D Supplementation During Pregnancy on Birth Size: A Systematic Review and Meta-Analysis of Randomized Controlled Trials
Source: MDPI journal article supplement (doi:10.3390/nu11020442), 2019-02-20
Supplement: s1 [file s1]

## Supplementary files

### S1. Prisma 2009 Checklist

| Section/topic                      | #  | Checklist item                                                                                                                                                                                                                                                                                              | Reported on page # |
|------------------------------------|----|-------------------------------------------------------------------------------------------------------------------------------------------------------------------------------------------------------------------------------------------------------------------------------------------------------------|--------------------|
| <b>TITLE</b>                       |    |                                                                                                                                                                                                                                                                                                             |                    |
| Title                              | 1  | Identify the report as a systematic review, meta-analysis, or both.                                                                                                                                                                                                                                         | 1                  |
| <b>ABSTRACT</b>                    |    |                                                                                                                                                                                                                                                                                                             |                    |
| Structured summary                 | 2  | Provide a structured summary including, as applicable: background; objectives; data sources; study eligibility criteria, participants, and interventions; study appraisal and synthesis methods; results; limitations; conclusions and implications of key findings; systematic review registration number. | 2-3                |
| <b>INTRODUCTION</b>                |    |                                                                                                                                                                                                                                                                                                             |                    |
| Rationale                          | 3  | Describe the rationale for the review in the context of what is already known.                                                                                                                                                                                                                              | 4-5                |
| Objectives                         | 4  | Provide an explicit statement of questions being addressed with reference to participants, interventions, comparisons, outcomes, and study design (PICOS).                                                                                                                                                  | 5                  |
| <b>METHODS</b>                     |    |                                                                                                                                                                                                                                                                                                             |                    |
| Protocol and registration          | 5  | Indicate if a review protocol exists, if and where it can be accessed (e.g., Web address), and, if available, provide registration information including registration number.                                                                                                                               | NA                 |
| Eligibility criteria               | 6  | Specify study characteristics (e.g., PICOS, length of follow-up) and report characteristics (e.g., years considered, language, publication status) used as criteria for eligibility, giving rationale.                                                                                                      | 6                  |
| Information sources                | 7  | Describe all information sources (e.g., databases with dates of coverage, contact with study authors to identify additional studies) in the search and date last searched.                                                                                                                                  | 5-6                |
| Search                             | 8  | Present full electronic search strategy for at least one database, including any limits used, such that it could be repeated.                                                                                                                                                                               | 5-6                |
| Study selection                    | 9  | State the process for selecting studies (i.e., screening, eligibility, included in systematic review, and, if applicable, included in the meta-analysis).                                                                                                                                                   | 6 and 8            |
| Data collection process            | 10 | Describe method of data extraction from reports (e.g., piloted forms, independently, in duplicate) and any processes for obtaining and confirming data from investigators.                                                                                                                                  | 6                  |
| Data items                         | 11 | List and define all variables for which data were sought (e.g., PICOS, funding sources) and any assumptions and simplifications made.                                                                                                                                                                       | 6                  |
| Risk of bias in individual studies | 12 | Describe methods used for assessing risk of bias of individual studies (including specification of whether this was done at the study or outcome level), and how this information is to be used in any data synthesis.                                                                                      | 6-7                |
| Summary measures                   | 13 | State the principal summary measures (e.g., risk ratio, difference in means).                                                                                                                                                                                                                               | 7                  |
| Synthesis of results               | 14 | Describe the methods of handling data and combining results of studies, if done, including measures of consistency (e.g., $I^2$ ) for each meta-analysis.                                                                                                                                                   | 7                  |

| Section/topic                 | #  | Checklist item                                                                                                                                                                                           | Reported on page #    |
|-------------------------------|----|----------------------------------------------------------------------------------------------------------------------------------------------------------------------------------------------------------|-----------------------|
| Risk of bias across studies   | 15 | Specify any assessment of risk of bias that may affect the cumulative evidence (e.g., publication bias, selective reporting within studies).                                                             | 6-7                   |
| Additional analyses           | 16 | Describe methods of additional analyses (e.g., sensitivity or subgroup analyses, meta-regression), if done, indicating which were pre-specified.                                                         | 7                     |
| <b>RESULTS</b>                |    |                                                                                                                                                                                                          |                       |
| Study selection               | 17 | Give numbers of studies screened, assessed for eligibility, and included in the review, with reasons for exclusions at each stage, ideally with a flow diagram.                                          | 8 and Figure 1        |
| Study characteristics         | 18 | For each study, present characteristics for which data were extracted (e.g., study size, PICOS, follow-up period) and provide the citations.                                                             | Table 1               |
| Risk of bias within studies   | 19 | Present data on risk of bias of each study and, if available, any outcome level assessment (see item 12).                                                                                                | 7 and Figure 7        |
| Results of individual studies | 20 | For all outcomes considered (benefits or harms), present, for each study: (a) simple summary data for each intervention group (b) effect estimates and confidence intervals, ideally with a forest plot. | Figures 2-6           |
| Synthesis of results          | 21 | Present results of each meta-analysis done, including confidence intervals and measures of consistency.                                                                                                  | 14-16 and Figures 2-6 |
| Risk of bias across studies   | 22 | Present results of any assessment of risk of bias across studies (see Item 15).                                                                                                                          | 16                    |
| Additional analysis           | 23 | Give results of additional analyses, if done (e.g., sensitivity or subgroup analyses, meta-regression [see Item 16]).                                                                                    | 14-16                 |
| <b>DISCUSSION</b>             |    |                                                                                                                                                                                                          |                       |
| Summary of evidence           | 24 | Summarize the main findings including the strength of evidence for each main outcome; consider their relevance to key groups (e.g., healthcare providers, users, and policy makers).                     | 17-19                 |
| Limitations                   | 25 | Discuss limitations at study and outcome level (e.g., risk of bias), and at review-level (e.g., incomplete retrieval of identified research, reporting bias).                                            | 17-19                 |
| Conclusions                   | 26 | Provide a general interpretation of the results in the context of other evidence, and implications for future research.                                                                                  | 17-19                 |
| <b>FUNDING</b>                |    |                                                                                                                                                                                                          |                       |
| Funding                       | 27 | Describe sources of funding for the systematic review and other support (e.g., supply of data); role of funders for the systematic review.                                                               | NA                    |

From: Moher D, Liberati A, Tetzlaff J, Altman DG, The PRISMA Group (2009). Preferred Reporting Items for Systematic Reviews and Meta-Analyses: The PRISMA Statement. PLoS Med 6(7): e1000097. doi:10.1371/journal.pmed1000097

**S2.** Search strategy used for PubMed and Cochrane Central Register of Controlled Trials databases

#1: "vitamin d" [Mesh] OR "ergocalciferol" [Mesh] OR "cholecalciferol" [Mesh] OR "calcifediol" [Mesh] OR "vitamin d supplementation" [Mesh] OR "25-hydroxyvitamin D" [Mesh]

#2: "birth size" [Mesh] OR "birth weight" [Mesh] OR "birth length" [Mesh] OR "head circumference" [Mesh] OR "low birth weight" [Mesh] OR "small for gestational age" [Mesh] OR "neonatal anthropometric measures" [Mesh]

#3: #1 AND #2

Filters: none

**S3.** Search strategy used for EMBASE database

1 vitamin d.mp.

2 ergocalciferol.mp.

3 cholecalciferol.mp.

4 calcifediol.mp.

5 vitamin d supplementation.mp.

6 25-hydroxyvitamin D.mp.

7 1 or 2 or 3 or 4 or 5 or 6

8 birth size.mp.

9 birth weight.mp.

10 birth length.mp.

11 head circumference.mp.

12 low birth weight.mp.

13 small for gestational age.mp.

14 neonatal anthropometric measures.mp.

15 8 or 9 or 10 or 11 or 12 or 13 or 14

12 7 and 15

#### S4. Full details of risk of bias assessment

| First Author, year | Random sequence generation (selection bias) | Allocation concealment (selection bias)                   | Blinding of participants and personnel (performance bias)          | Blinding of outcome assessment (detection bias)                          | Incomplete outcome data (attrition bias)                                          | Selective reporting (reporting bias)   | Other bias                                                      |
|--------------------|---------------------------------------------|-----------------------------------------------------------|--------------------------------------------------------------------|--------------------------------------------------------------------------|-----------------------------------------------------------------------------------|----------------------------------------|-----------------------------------------------------------------|
| Asemi, 2016        | Low risk: Computer generated sequence       | Unclear risk: Insufficient information                    | Low risk: Blinding of participants and key study personnel ensured | Low risk: Outcomes assessed by Investigators blind to original treatment | Low risk: No missing data                                                         | Low risk: All outcomes reported        | Low risk: The study appears to be free of other sources of bias |
| Brooke, 1980       | Unclear risk: Insufficient information      | Unclear risk: Insufficient information                    | Low risk: Blinding of participants and key study personnel ensured | Low risk: Outcomes assessed by Investigators blind to original treatment | Low risk: No missing data                                                         | Low risk: All outcomes reported        | Low risk: The study appears to be free of other sources of bias |
| Brough, 2010       | Unclear risk: Insufficient information      | Unclear risk: Insufficient information                    | Low risk: Blinding of participants and key study personnel ensured | Low risk: Outcomes assessed by Investigators blind to original treatment | Low risk: No missing data                                                         | Low risk: All outcomes reported        | Low risk: The study appears to be free of other sources of bias |
| Charandabi, 2015   | Low risk: Computer generated sequence       | Low risk: Sequentially numbered, opaque, sealed envelopes | Low risk: Blinding of participants and key study personnel ensured | Low risk: Outcomes assessed by Investigators blind to original treatment | Low risk: Reasons for missing outcome data unlikely to be related to true outcome | Low risk: All outcomes reported        | Low risk: The study appears to be free of other sources of bias |
| Goldring, 2013     | Low risk: Computer generated sequence       | Low risk: Pharmacy-controlled allocation                  | Low risk: Blinding of participants and key study personnel ensured | Low risk: Outcomes assessed by Investigators blind to original treatment | Low risk: Reasons for missing outcome data unlikely to be related to true outcome | Low risk: All outcomes reported        | Low risk: The study appears to be free of other sources of bias |
| Hollis, 2011       | Low risk: Computer generated sequence       | Unclear risk: Insufficient information                    | Low risk: Blinding of participants and key study personnel ensured | Low risk: Outcomes assessed by Investigators blind to original treatment | Low risk: Reasons for missing outcome data unlikely to be related to true outcome | Low risk: All outcomes reported        | Low risk: The study appears to be free of other sources of bias |
| Hossain, 2014      | Unclear risk: Insufficient information      | Unclear risk: Insufficient information                    | High risk: No blinding                                             | Unclear risk: Insufficient information                                   | Low risk: Reasons for missing outcome data unlikely to be related to true outcome | Unclear risk: Insufficient information | Low risk: The study appears to be free of other sources of bias |

**S5.** Assessment of the quality of the evidence using the GRADE approach

| <b>Outcome: Birthweight</b> |               |                                                                 |                            |
|-----------------------------|---------------|-----------------------------------------------------------------|----------------------------|
| <b>Grade criteria</b>       | <b>Rating</b> | <b>Footnotes (explain reasons for down- or upgrading)</b>       | <b>Quality of evidence</b> |
| <b>Study design</b>         | RCT           |                                                                 | ⊕⊕⊕0<br>Moderate           |
| <b>Risk of bias</b>         | Unclear       | Most information is from studies at low or unclear risk of bias |                            |
| <b>Inconsistency</b>        | No            |                                                                 |                            |
| <b>Indirectness</b>         | No            |                                                                 |                            |
| <b>Imprecision</b>          | Serious (-1)  | Low sample size                                                 |                            |
| <b>Publication Bias</b>     | Undetected    |                                                                 |                            |
| <b>Other</b>                | No            |                                                                 |                            |

| <b>Outcome: Birth length</b> |               |                                                                 |                            |
|------------------------------|---------------|-----------------------------------------------------------------|----------------------------|
| <b>Grade criteria</b>        | <b>Rating</b> | <b>Footnotes (explain reasons for down- or upgrading)</b>       | <b>Quality of evidence</b> |
| <b>Study design</b>          | RCT           |                                                                 | ⊕⊕⊕0<br>Moderate           |
| <b>Risk of bias</b>          | Unclear       | Most information is from studies at low or unclear risk of bias |                            |
| <b>Inconsistency</b>         | No            |                                                                 |                            |
| <b>Indirectness</b>          | No            |                                                                 |                            |
| <b>Imprecision</b>           | Serious (-1)  | Low sample size                                                 |                            |
| <b>Publication Bias</b>      | Undetected    |                                                                 |                            |
| <b>Other</b>                 | No            |                                                                 |                            |

| <b>Outcome: Head circumference</b> |                   |                                                                                            |                            |
|------------------------------------|-------------------|--------------------------------------------------------------------------------------------|----------------------------|
| <b>Grade criteria</b>              | <b>Rating</b>     | <b>Footnotes (explain reasons for down- or upgrading)</b>                                  | <b>Quality of evidence</b> |
| <b>Study design</b>                | RCT               |                                                                                            | ⊕ 0 0 0<br>Very low        |
| <b>Risk of bias</b>                | Very Serious (-2) | High risk of bias for one study which mostly contributes to results (Hossain et al., 2014) |                            |
| <b>Inconsistency</b>               | No                |                                                                                            |                            |
| <b>Indirectness</b>                | No                |                                                                                            |                            |
| <b>Imprecision</b>                 | Serious (-1)      | Low sample size                                                                            |                            |
| <b>Publication Bias</b>            | Undetected        |                                                                                            |                            |
| <b>Other</b>                       | No                |                                                                                            |                            |

| Outcome: Low birthweight |              |                                                                 |                     |
|--------------------------|--------------|-----------------------------------------------------------------|---------------------|
| Grade criteria           | Rating       | Footnotes (explain reasons for down- or upgrading)              | Quality of evidence |
| Study design             | RCT          |                                                                 | ⊕⊕⊕0<br>Moderate    |
| Risk of bias             | Unclear      | Most information is from studies at low or unclear risk of bias |                     |
| Inconsistency            | No           |                                                                 |                     |
| Indirectness             | No           |                                                                 |                     |
| Imprecision              | Serious (-1) | Low number of events                                            |                     |
| Publication Bias         | Undetected   |                                                                 |                     |
| Other                    | No           |                                                                 |                     |

| Outcome: Small for gestational age |              |                                                                 |                     |
|------------------------------------|--------------|-----------------------------------------------------------------|---------------------|
| Grade criteria                     | Rating       | Footnotes (explain reasons for down- or upgrading)              | Quality of evidence |
| Study design                       | RCT          |                                                                 | ⊕⊕⊕0<br>Moderate    |
| Risk of bias                       | Unclear      | Most information is from studies at low or unclear risk of bias |                     |
| Inconsistency                      | No           |                                                                 |                     |
| Indirectness                       | No           |                                                                 |                     |
| Imprecision                        | Serious (-1) | Low number of events                                            |                     |
| Publication Bias                   | Undetected   |                                                                 |                     |
| Other                              | No           |                                                                 |                     |
